# Supplementary material
Source: PubMed Central journal article supplement (PMC5828106)
Supplement: NIHMS75137-supplement-Supplementary_tables_2-5_.pdf [file NIHMS75137-supplement-Supplementary_tables_2-5_.pdf]

## **Loss-of-function variants in *ADCY3* increase risk of obesity and type 2 diabetes**

Niels Grarup<sup>1\*</sup>, Ida Moltke<sup>2\*</sup>, Mette K. Andersen<sup>1</sup>, Maria Dalby<sup>2</sup>, Kristoffer Vitting-Seerup<sup>2,3</sup>, Timo Kern<sup>1</sup>, Yuvaraj Mahendran<sup>1</sup>, Emil Jørsboe<sup>2</sup>, Christina V.L. Larsen<sup>4,5</sup>, Inger K. Dahl-Petersen<sup>4</sup>, Arthur Gilly<sup>6</sup>, Daniel Suveges<sup>6</sup>, George Dedoussis<sup>7</sup>, Eleftheria Zeggini<sup>6</sup>, Oluf Pedersen<sup>1</sup>, Robin Andersson<sup>2</sup>, Peter Bjerregaard<sup>4,5</sup>, Marit E. Jørgensen<sup>4,5,8</sup>, Anders Albrechtsen<sup>2</sup>, Torben Hansen<sup>1,9</sup>

### **Supplementary Tables**

**Supplementary Table 2. Association of *ADCY3* c.2433-1G>A with a range of metabolic and anthropometric traits in Greenlandic cohorts.**

| Trait                                    | N     | Recessive model |                  |         |               | Additive model |                  |         |                |
|------------------------------------------|-------|-----------------|------------------|---------|---------------|----------------|------------------|---------|----------------|
|                                          |       | $\beta_{SD}$    | se <sub>SD</sub> | $\beta$ | P             | $\beta_{SD}$   | se <sub>SD</sub> | $\beta$ | P              |
| Height (cm)                              | 4,018 | -0.354          | 0.264            | -2.55   | 0.18          | -0.056         | 0.059            | -0.41   | 0.34           |
| Weight (kg)                              | 4,002 | 0.922           | 0.345            | 15.6    | <b>0.0076</b> | 0.148          | 0.073            | 2.13    | 0.044          |
| Waist circumference (cm)                 | 3,964 | 1.083           | 0.346            | 16.59   | <b>0.0017</b> | 0.138          | 0.073            | 2.12    | 0.060          |
| Hip circumference (cm)                   | 3,962 | 0.746           | 0.354            | 7.981   | <b>0.035</b>  | 0.091          | 0.075            | 1.00    | 0.225          |
| Waist-hip ratio                          | 3,961 | 0.995           | 0.328            | 0.086   | <b>0.0024</b> | 0.13           | 0.069            | 0.012   | 0.060          |
| VAT (cm)                                 | 2,681 | 0.858           | 0.352            | 2.161   | <b>0.019</b>  | 0.149          | 0.08             | 0.30    | 0.063          |
| SAT (cm)                                 | 2,671 | 0.293           | 0.363            | 0.562   | 0.42          | 0.044          | 0.083            | 0.086   | 0.59           |
| SAT-VAT ratio                            | 2,663 | -0.421          | 0.364            | -0.079  | 0.25          | -0.032         | 0.082            | -0.0090 | 0.70           |
| Fasting serum insulin (pmol/L)           | 3,620 | 0.804           | 0.367            | 27.0    | <b>0.028</b>  | 0.042          | 0.078            | 1.70    | 0.59           |
| 2-h serum insulin (pmol/L)               | 3,387 | 0.442           | 0.364            | 129     | 0.22          | 0.126          | 0.078            | 34.5    | 0.11           |
| HbA <sub>1c</sub> (%)                    | 4,024 | 0.575           | 0.285            | 0.316   | <b>0.044</b>  | 0.066          | 0.061            | 0.025   | 0.28           |
| HOMA-IR (mmol/Lxpmol/L)                  | 3,613 | 0.909           | 0.37             | 1.25    | <b>0.014</b>  | 0.064          | 0.079            | 0.125   | 0.42           |
| ISI <sub>0,120</sub>                     | 3,354 | -0.785          | 0.357            | -0.136  | <b>0.028</b>  | -0.172         | 0.076            | -0.128  | <b>0.024</b>   |
| Fasting serum HDL-cholesterol (mmol/L)   | 4,035 | -0.812          | 0.334            | -0.282  | <b>0.015</b>  | -0.125         | 0.072            | -0.047  | 0.082          |
| Fasting serum total cholesterol (mmol/L) | 3,895 | 0.08            | 0.352            | 0.112   | 0.82          | 0.127          | 0.071            | 0.151   | 0.074          |
| Fasting serum triglyceride (mmol/L)      | 4,035 | 0.815           | 0.358            | 1.13    | <b>0.023</b>  | 0.266          | 0.076            | 0.219   | <b>0.00046</b> |

Results are shown for a recessive and an additive model.  $\beta_{SD}$  is the effect size estimated using traits values quantile transformed to a normal distribution and  $\beta$  is the effect size estimated

using untransformed values. The *P*-values are obtained from the quantile transformed value based analyses. *P*-values shown have not been corrected for multiple testing and nominally significant *P*-values are highlighted in bold. ISI, Insulin sensitivity index; SAT, Subcutaneous adipose tissue; VAT, Visceral adipose tissue.

**Supplementary Table 3. Association with burden of heterozygous loss-of-function variants in *ADCY3* in trans-ethnic cohorts.**

|                                                                                  | Type 2 diabetes   | Controls         | Quantile | <i>P</i> | OR (95% CI)      |
|----------------------------------------------------------------------------------|-------------------|------------------|----------|----------|------------------|
| Loss-of-function variants in <i>ADCY3</i> (excluding rs146165057)                | HE=7<br>WT=8,845  | HE=1<br>WT=9,323 | 0.034    | 0.044    | 8.6 (1.1 - 69.5) |
| Loss-of-function variants in <i>ADCY3</i> (AMP-T2D annotation incl. rs146165057) | HE=12<br>WT=8,840 | HE=4<br>WT=9,320 | 0.032    | 0.037    | 3.4 (1.1 - 10.4) |

Data are from Accelerating Medicines Partnership Type 2 Diabetes Knowledge Portal (AMP-T2D; <http://www.type2diabetesgenetics.org/>) generated by the GoT2D, T2DGenes, SIGMA and LuCAMP consortia<sup>6,7,8</sup>. Variants annotated as stop-gained, frameshift or in a splice adapter/donor site were considered loss-of-function. All loss-of-function variants had a minor allele frequency (MAF) <5%. Burden association analyses were performed with principal components 1-4, age and sex as covariates and using data from individuals (*N*=18,176) that had no missing phenotype data. The counts of loss-of-function carriers stratified by ancestry are shown in Supplementary Table 5. At the AMP-T2D online site the rs146165057 (2:25048965-C/T) variant is annotated as a frameshift variant and is therefore included in the site's loss-of-function analyses. The second line of results in the table shows the results including this variant. However, rs146165057 is predicted to be a missense variant rather than a frameshift variant in dbSNP, so those results are not the relevant ones and are only included for completeness. The relevant results, and the one reported in the main paper, can be found in the first line of results in the table, where we manually analyzed the data excluding the rs146165057 missense carriers as loss-of-function carriers. Quantiles were calculated as the rank of *ADCY3* in the distribution of *P*-values for all genes in the dataset. No homozygous carriers were observed. HE, heterozygous; WT, wild type.

**Supplementary Table 4. Loss-of-function variants in *ADCY3* in the Greenlandic and trans-ethnic cohorts.**

| Dataset   | Position (hg19) | Exon | Variant ID       | Consequence        | Annotation      | All (gnomAD) WT/HE/HO | Non-diabetic controls (Greenland or AMP-T2D) WT/HE/HO | Type 2 diabetes patients (Greenland or AMP-T2D) WT/HE/HO |
|-----------|-----------------|------|------------------|--------------------|-----------------|-----------------------|-------------------------------------------------------|----------------------------------------------------------|
| Greenland | 25050478        | 14   | 2:25050478-G/A   | c.2433-1G>A        | Splice acceptor | NA                    | 3,823/171/7                                           | 293/20/3                                                 |
| AMP-T2D   | 25042887        | 21   | 2:25042887-AG/A  | p.Phe1117SerfsTer3 | Frameshift      | 243,698/1/0           | 9,324/0/0                                             | 8,851/1/0                                                |
| AMP-T2D   | 25047374        | 16   | 2:25047374-C/T   | p.Trp870Ter        | Stop-gained     | 123,130/1/0           | 9,323/1/0                                             | 8,852/0/0                                                |
| AMP-T2D   | 25048965        | 15   | 2:25048965-CAT/C | p.Met842AspfsTer31 | Frameshift      | 122,987/1/0           | 9,324/0/0                                             | 8,851/1/0                                                |
| AMP-T2D   | 25048965*       | 15   | 2:25048965-C/T*  | p.Met842Ile        | Missense*       | 138,356/92/0          | 9,321//3/0                                            | 8,847/5/0                                                |
| AMP-T2D   | 25050893        | 13   | 2:25050893-G/A   | c.1072-1G>A        | Splice acceptor | 138,588/13/0          | 9,324/0/0                                             | 8,851/1/0                                                |
| AMP-T2D   | 25057661        | 9    | 2:25057661-T/C   | c.1805+2T>C        | Splice donor    | 123,024/2/0           | 9,324/0/0                                             | 8,851/1/0                                                |
| AMP-T2D   | 25062828        | 6    | 2:25062828-G/GC  | p.Val424ArgfsTer15 | Frameshift      | 122,849/1/0           | 9,324/0/0                                             | 8,851/1/0                                                |
| AMP-T2D   | 25141426        | 1    | 2:25141426-C/T   | p.Trp144Ter        | Stop-gained     | 123,012/2/0           | 9,324/0/0                                             | 8,850/2/0                                                |

Variants were annotated to canonical transcript *ADCY3*-001 (NM\_004036) except c.1072-1G>A, which is annotated to alternative transcript *ADCY3*-201 (NM\_001320613). Trans-ethnic cohort data were obtained from AMP-T2D (<http://www.type2diabetesgenetics.org/>), and only those tested for association are included. GnomAD genotype counts are from data obtained at <http://gnomad.broadinstitute.org/gene/ENSG00000138031>. HE, heterozygous; HO homozygous; WT, wildtype; T2D, type 2 diabetes. \*This variant is annotated in AMP-T2D as frameshift but is a missense variant. This was therefore excluded from the final analysis of loss-of-function variants.

**Supplementary Table 5. Loss-of-function variants in trans-ethnic cohorts stratified by ancestry**

|                  |                | Type 2 diabetic individuals |                        |                  | Non-diabetic individuals |                        |                  |
|------------------|----------------|-----------------------------|------------------------|------------------|--------------------------|------------------------|------------------|
|                  | <i>N</i> (all) | <i>N</i> (total)            | <i>N</i> (HE carriers) | Allele frequency | <i>N</i> (total)         | <i>N</i> (HE carriers) | Allele frequency |
| European         | 6,356          | 3,214                       | 1                      | 0.016%           | 3,142                    | 0                      | 0%               |
| African-American | 1,741          | 734                         | 4                      | 0.27%            | 1,007                    | 1                      | 0.050%           |
| East Asian       | 2,158          | 1,009                       | 0                      | 0%               | 1,149                    | 0                      | 0%               |
| Hispanic         | 5,722          | 2,811                       | 2                      | 0.036%           | 2,911                    | 0                      | 0%               |
| South Asian      | 2,199          | 1,084                       | 0                      | 0%               | 1,115                    | 0                      | 0%               |
| Total            | 18,176         | 8,852                       | 7                      | 0.040%           | 9,324                    | 1                      | 0.0054%          |

No homozygous carriers were observed. HE, heterozygous.

**Supplementary Table 6. Clinical descriptive data of Greenlandic individuals in all individuals and stratified according to disease state**

|                                          | All individuals        | Non-diabetic individuals | Type 2 diabetic individuals | Obese (BMI>30 kg/m <sup>2</sup> ) |
|------------------------------------------|------------------------|--------------------------|-----------------------------|-----------------------------------|
| N (men/women)                            | 4,038<br>(1,794/2,244) | 2,585<br>(1,100/1,485)   | 301 (136/165)               | 861 (315/546)                     |
| Age (yrs)                                | 44.1 (14.7)            | 41.0 (13.1)              | 57.8 (12.8)                 | 47.2 (13.6)                       |
| Height (cm)                              | 162 (9.3)              | 163 (9.1)                | 159 (9.0)                   | 161 (9.0)                         |
| Weight (kg)                              | 69.2 (15.4)            | 68.4 (14.5)              | 73.8 (20)                   | 88 (12.9)                         |
| BMI (kg/m <sup>2</sup> )                 | 26.3 (5.1)             | 25.7 (4.7)               | 29.1 (6.8)                  | 33.9 (3.5)                        |
| Waist circumference (cm)                 | 90.8 (13.4)            | 89.1 (12.3)              | 99.3 (16.2)                 | 109.0 (9.3)                       |
| Hip circumference (cm)                   | 98.7 (9.5)             | 98.2 (9.0)               | 102.0 (11.5)                | 110.0 (7.8)                       |
| Waist-hip ratio                          | 0.918 (0.082)          | 0.906 (0.078)            | 0.974 (0.088)               | 0.988 (0.075)                     |
| VAT (cm)                                 | 7.04 (2.26)            | 6.70 (2.01)              | 8.34 (2.89)                 | 9.34 (2.38)                       |
| SAT (cm)                                 | 3.01 (1.52)            | 2.99 (1.53)              | 3.14 (1.54)                 | 4.48 (1.34)                       |
| SAT-VAT ratio                            | 0.448 (0.241)          | 0.464 (0.249)            | 0.401 (0.219)               | 0.527 (0.24)                      |
| F-p glucose (mmol/L)                     | 5.70 (0.93)            | 5.39 (0.41)              | 7.54 (2.3)                  | 6.05 (1.1)                        |
| 2-h-p glucose (mmol/L)                   | 5.90 (2.5)             | 5.00 (1.3)               | 11.1 (4.8)                  | 6.90 (2.9)                        |
| Fasting serum insulin (pmol/L)           | 38 (25-56)             | 36 (25-52)               | 50 (32.5-89)                | 65 (46-92)                        |
| 2-h serum insulin (pmol/L)               | 109 (47-211)           | 87 (39-164)              | 233 (124-412)               | 180 (87-326)                      |
| HbA1C (%)                                | 5.79 (0.55)            | 5.67 (0.40)              | 6.42 (1.14)                 | 5.95 (0.65)                       |
| HOMA-IR (mmol/Lxpmol/L)                  | 1.35 (0.88-2.07)       | 1.23 (0.82-1.82)         | 2.36 (1.5-4.5)              | 2.46 (1.73-3.54)                  |
| ISI <sub>0,120</sub>                     | 2.63 (1.91-3.94)       | 3.03 (2.3-4.39)          | 1.19 (0.955-1.61)           | 1.98 (1.45-2.66)                  |
| Fasting serum HDL-cholesterol (mmol/L)   | 1.66 (0.53)            | 1.65 (0.49)              | 1.77 (0.78)                 | 1.43 (0.44)                       |
| Fasting serum total cholesterol (mmol/L) | 5.88 (1.21)            | 5.79 (1.2)               | 6.32 (1.28)                 | 6.15 (1.19)                       |
| Fasting serum triglyceride (mmol/L)      | 1.01 (0.75-1.39)       | 0.96 (0.73-1.29)         | 1.22 (0.85-1.9)             | 1.34 (0.97-1.89)                  |
| Type 2 diabetes (% cases)                | 7.5                    | 0                        | 100                         | 14                                |

Clinical descriptive data for the individuals included in the Greenlandic association studies. Data are mean (SD) for normally distributed traits or median (interquartile range) for non-normally distributed traits unless otherwise stated. Data are shown in all, in type 2 diabetes controls and cases and for obese (BMI>30 kg/m<sup>2</sup>) individuals. ISI, insulin sensitivity index; SAT, subcutaneous adipose tissue; VAT, visceral adipose tissue.
